# Supplementary material for: Construction and Application of a Plasmid-Based Signal Peptide Library for Improved Secretion of Recombinant Proteins with Priestia megaterium
Source: MDPI journal article supplement (doi:10.3390/microorganisms10040777), 2022-04-05
Supplement: s1 [file s1]

# Supplementary Material

Table S1: List of plasmids.

| Plasmid                   | Description                                                                                                                                                                                                                                                                                                                                            | Origin                        |
|---------------------------|--------------------------------------------------------------------------------------------------------------------------------------------------------------------------------------------------------------------------------------------------------------------------------------------------------------------------------------------------------|-------------------------------|
| p3STOP1623hp              | Shuttle vector for cloning in <i>E. coli</i> (Carb <sup>R</sup> ) and recombinant protein production in <i>P. megaterium</i> (Tet <sup>R</sup> ) using an optimized xylose-inducible promoter; <i>P<sub>xyIA<sup>opt</sup></sub></i> -mcs-stop                                                                                                         | [1]                           |
| pTKSP0                    | p3STOP1623hp-derivative; shuttle vector for cloning in <i>E. coli</i> (Carb <sup>R</sup> ) and recombinant protein production in <i>P. megaterium</i> (Tet <sup>R</sup> ) with an optimized xylose-inducible promoter, an extended multiple cloning site and His <sub>6</sub> -tag; <i>P<sub>xyIA<sup>opt</sup></sub></i> -emcs-his <sub>6</sub> -stop | This work                     |
| pTKSP <sub>amyE0</sub>    | pTKSP0-derivative harboring the <i>amyE</i> gene from <i>B. subtilis</i> 168 without signal peptide inserted via NgoMIV and AgeI                                                                                                                                                                                                                       | This work                     |
| pEJBmD1.3scFv             | Shuttle vector for the xylose-inducible recombinant production and secretion of the antibody fragment D1.3 scFv guided by the signal peptide of the lipase A (SP <sub>LipA</sub> ) from <i>P. megaterium</i> ATCC 9885 (CAD23620.1); <i>P<sub>xyIA</sub></i> -SP <sub>LipA</sub> -d1.3scFv                                                             | [2]                           |
| pTKSP <sub>amyElipA</sub> | pTKSP <sub>amyE0</sub> -derivative containing the signal peptide from lipase A (SP <sub>LipA</sub> ) from <i>P. megaterium</i> ATCC 9885 (CAD23620.1) amplified via PCR from pEJBmD1.3scFv [2] and inserted via the restriction sites BsrGI and NgoMIV                                                                                                 | This work                     |
| pALBm1                    | p3STOP1623hp-derivative for recombinant production and secretion of PGA from <i>P. megaterium</i> (BmPGA); <i>P<sub>xyIA<sup>opt</sup></sub></i> -bmpga-stop                                                                                                                                                                                           | [3]                           |
| pRBBm311                  | p3STOP1623hp-derivative for recombinant production and secretion of PGA from <i>Bacillus thermotolerans</i> (BtPGA); <i>P<sub>xyIA<sup>opt</sup></sub></i> -btpga-stop                                                                                                                                                                                 | [4]                           |
| pRBBm316                  | p3STOP1623hp-derivative for recombinant production and secretion of PGA from <i>Bacillus sp. FJAT-27231</i> (FJATPGA); <i>P<sub>xyIA<sup>opt</sup></sub></i> -fjatpga-stop                                                                                                                                                                             | [4]                           |
| pRBBm317                  | p3STOP1623hp-derivative for recombinant production and secretion of PGA from <i>Bacillus massiliogorillae</i> (BmasPGA); <i>P<sub>xyIA<sup>opt</sup></sub></i> -bmaspga-stop                                                                                                                                                                           | [4]                           |
| pJMBm75                   | pTKSP0-derivative harboring the <i>bmaspga</i> gene from pRBBm317 without signal peptide inserted via NgoMIV and NheI                                                                                                                                                                                                                                  | This work                     |
| pMSP1 - pMSP9             | pUC57-derivative encoding 18 signal peptides of <i>P. megaterium</i> DSM 319 separated by the restriction sites BsrGI and NgoMIV, Carb <sup>R</sup> , <i>ori</i> pBR322                                                                                                                                                                                | This work, General Biosystems |
| pMSP10                    | pUC57-derivative encoding 20 signal peptides of <i>P. megaterium</i> DSM 319 separated by the restriction sites BsrGI and NgoMIV, Carb <sup>R</sup> , <i>ori</i> pBR322                                                                                                                                                                                | This work, General Biosystems |

Table S2: List of oligos.

| Name of oligo   | Description                                                                                                                                                                                                                                                        | Sequence                                                                               |
|-----------------|--------------------------------------------------------------------------------------------------------------------------------------------------------------------------------------------------------------------------------------------------------------------|----------------------------------------------------------------------------------------|
| TKMCSHis_fw     | Oligo for insertion of MCS extension, coding sequence of His <sub>6</sub> -tag and stop codon into p3STOP1623hp; the restriction sites are depicted in italics, the AgeI overhang in bold, the His <sub>6</sub> -tag in gray and the stop codon in capital letters | <b>ccggcgcgcgtacgcgtac</b> <i>taggagcggccgcgctagcaaccgg</i> catcaccatcaccatcacTA<br>At |
| TKMCSHis_rv     | Oligo for insertion of MCS extension, coding sequence of His <sub>6</sub> -tag and stop codon into p3STOP1623hp; the restriction sites are depicted in italics, the AgeI overhang in bold, the His <sub>6</sub> -tag in gray and the stop codon in capital letters | <b>ccggaTTA</b> gtgatggatggatggatgaccggttgctagcgcggccgctcctaggtacgcgtacg<br>gcg        |
| TKAmyE_fw       | Primer for amplification and insertion of <i>B. subtilis amyE</i> gene in pTKSP0 resulting in pTKSPamyE0, the NgoMIV site is shown in italics                                                                                                                      | atcatagccggcgaaacggcgacaacatcg                                                         |
| TKAmyE_rv       | Primer for amplification and insertion of <i>B. subtilis amyE</i> gene in pTKSP0 resulting in pTKSPamyE0, the AgeI site is shown in italics                                                                                                                        | atcataaccgggtcaatggggaagagaacc                                                         |
| TK83fw_LipA_SP  | Primer for amplification of lipase A-SP from pEJBmD1.3scFv [2] and insertion into pTKSPamyE0 yielding pTKSPamyElipA, the BsrGI restriction site is depicted in italics                                                                                             | atcatgtacaatgaaaaaagtattaatggcttc                                                      |
| TK84rev_LipA_SP | Primer for amplification of lipase A-SP from pEJBmD1.3scFv [2] and insertion into pTKSPamyE0 yielding pTKSPamyElipA, the NgoMIV restriction site is depicted in italics                                                                                            | atcatagccggcggcgctagcacctgatg                                                          |
| JMSPBmas_fw     | Primer for amplification and insertion of <i>bmaspga</i> gene from pRRBm317 into pTKSP0 resulting in pJMBm75, the NgoMIV restriction site is depicted in italics                                                                                                   | tgatctgccggccaaaataacagcggagtgaag<br>ag                                                |
| JMSPBmas_rv     | Primer for amplification and insertion of <i>bmaspga</i> gene from pRRBm317 into pTKSP0 resulting in pJMBm75, the NheI restriction site is depicted in italics                                                                                                     | tgatctgctagcttatttttttcgtttctttgtaa<br>atg                                             |
| SeqpXylA_fw     | Primer for colony PCR and sequencing                                                                                                                                                                                                                               | aagttgggtgtttttgaagc                                                                   |
| SeqpMM1520_rv   | Primer for colony PCR                                                                                                                                                                                                                                              | gtttgcgcattcacagtctcc                                                                  |

Table S3: List of signal peptides available at pMSP1

| Signal peptide | GenBank ID | Native protein                               | Sequence                                                    |
|----------------|------------|----------------------------------------------|-------------------------------------------------------------|
| SP 1           | ADF38846.1 | pullulanase, type I                          | MITLSKKVIVKNVYVFYFMGGFSLKCSW<br>TKYAMVLTALLLVSSFFSPFMQSFASA |
| SP 2           | ADF41409.1 | protein of unknown function (DUF1510)        | MNNNRSSRHENKEKKVNRLYNLLIAVV<br>AVLIVFVGGTMILGNKDKSDNQA      |
| SP 3           | ADF37872.1 | conserved hypothetical protein BMD_1011      | MYRKKTLLLKRSLGVAVFLSVIALGVW<br>MFQFTFFSPSHQAKS              |
| SP 4           | ADF37126.1 | SH3 domain protein                           | MEGKQLKRIMVGMALTATLATAVTPGF<br>GSIGGNQEKAYA                 |
| SP 5           | ADF38520.1 | transporter, MmpL family                     | MKESPLATFSRLMTGKVSRLVAVWIL<br>ATAFLTIAWP                    |
| SP 6           | ADF40203.1 | beta-lactamase penicillinase                 | MKTWKKMFRASKLQKMLPVFALSCAA<br>VVGFSSEVHA                    |
| SP 7           | ADF39316.1 | alpha amylase                                | MQTIAKKGDETMKGKKWTALALTPL<br>AASLSTGVHA                     |
| SP 8           | ADF37367.1 | conserved hypothetical protein BMD_0481      | MKTITKSISVLALAAGFTFSSLSGTLPTH<br>EQTASA                     |
| SP 9           | ADF38797.1 | polysaccharide deacetylase                   | MNQRFKPNKRFYAFSLVLVIVASLFFIT<br>EAKGSES                     |
| SP 10          | ADF39301.1 | methyl-accepting chemotaxis protein          | MERVRRKRSLNNFKIKLGLAFAAILLVP<br>SVTIGVSA                    |
| SP 11          | ADF40620.1 | conserved hypothetical protein BMD_3787      | MKMKQRLSKAAAAATTGIAAFGFAPV<br>AQFDTPAHA                     |
| SP 12          | ADF41198.1 | protein of unknown function (DUF1002)        | MGLKEEKGLKLTIKAIMVTGLLLLFLTA<br>PLKSFADA                    |
| SP 13          | ADF41350.1 | cytochrome c-550                             | MKRNPLIPFLIAVIGIALMLTSLFNGLN<br>NAKEIAA                     |
| SP 14          | ADF37697.1 | two-component sensor histidine kinase DctS   | MRLSMQTKMTGLIFFIVAFSLFLASIVVI<br>NNFVQS                     |
| SP 15          | ADF40228.1 | hypothetical protein BMD_3388                | MDFFKNSKILYTIVALVIALIAVFTNNSPI<br>SLIQQ                     |
| SP 16          | ADF41000.1 | flagellar basal body-associated protein FliL | MFKNKLISKMIIMLSLTLIGSIAVIVTLKY<br>TEQA                      |
| SP 17          | ADF42034.1 | putative peptidase                           | MIGKVLAKAVVAKAVGGATIGTAIAL<br>GSMTSAFA                      |
| SP 18          | ADF38992.1 | hypothetical protein BMD_2139                | MNISFKKFRFLWFILLIFVLIFVKNTFFSSS<br>QNA                      |

Table S4: List of signal peptides available at pMSP2

| Signal peptide | GenBank ID | Native protein                                           | Sequence                                |
|----------------|------------|----------------------------------------------------------|-----------------------------------------|
| SP 1           | ADF38011.1 | membrane-bound protein, putative transcription regulator | MSSKAKKEWIGGLVFLLVSVFSI<br>TFAGYHTVKA   |
| SP 2           | ADF39126.1 | immune inhibitor A metalloprotease                       | MKSWKKILGTSFLATTVTLSGVG<br>PVLMMNGSTASA |
| SP 3           | ADF39213.1 | putative membrane protein                                | MKFIVKFKWVIAAFILALTVILM<br>LTSPNLTKLA   |

|       |            |                                                                                |                                    |
|-------|------------|--------------------------------------------------------------------------------|------------------------------------|
| SP 4  | ADF39764.1 | conserved hypothetical protein BMD_2923                                        | MKLGNQKLIYFSPHVVAVIFIFIL TLIPSASS  |
| SP 5  | ADF37892.1 | hypothetical protein BMD_1031                                                  | MDRKKVASVAGALVIAVGIWLF QSGKFKSEAQA |
| SP 6  | ADF38238.1 | conserved hypothetical protein BMD_1377                                        | MKKLIIVAVAAVLLIIGGISFSIYH SSVKDVQS |
| SP 7  | ADF39097.1 | conserved hypothetical protein BMD_2249                                        | MVKKLLAAFIALAVVFSPVGGSL IHDGSNVASA |
| SP 8  | ADF39532.1 | 2',3'-cyclic-nucleotide 2'-phosphodiesterase                                   | MKKNTRSKTKKILSTSLALSLLS MPLLTQAGA  |
| SP 9  | ADF38212.1 | cytochrome aa3 oxidase assembly protein                                        | MRLGLKFLSVVTTMAMLLILLG GALVTKTGSA  |
| SP 10 | ADF39833.1 | Endopeptidase                                                                  | MKKEKLLVPFIAASVLVGASVTT PVFHSAYA   |
| SP 11 | ADF40159.1 | putative hydrolase                                                             | MKKVKAALPLAVSLALGLQVLP ISTPIVQAEA  |
| SP 12 | ADF41059.1 | phosphopantothienoylcysteine decarboxylase/phosphopantothenate-cysteine ligase | MMKGKRILLCVSGGIIVYKAAA LTSKLVQAGA  |
| SP 13 | ADF41166.1 | spore cortex-lytic enzyme                                                      | MLSFRCFKKYACLICISFIAASV VCPKAAHA   |
| SP 14 | ADF40390.1 | putative protease, NlpC/P60 family                                             | MLKKANRTVMNMGLAALLVP AALTFSTTSASA  |
| SP 15 | ADF37926.1 | endopeptidase LytE                                                             | MKKAIIGSITAAAVLFSGASPFIA PAQTVEA   |
| SP 16 | ADF38355.1 | alkaline phosphatase                                                           | MKKRAIGAAVLSAVTVAALAFG TNSPLDAKA   |
| SP 17 | ADF39787.1 | conserved hypothetical protein BMD_2947                                        | MKKAIVLTYCILSLVLLVSGGLYF KEQMVEA   |
| SP 18 | ADF40655.1 | polysaccharide deacetylase                                                     | MKKYVFFLLIAAALVGFIFFKVV NWEDKAKA   |

Table S5: List of signal peptides available at pMSP3

| Signal peptide | GenBank ID | Native protein                          | Sequence                         |
|----------------|------------|-----------------------------------------|----------------------------------|
| SP 1           | ADF37265.1 | conserved hypothetical protein BMD_0354 | MMKPIVLNKKIGSIVLIFSLLYFPI AAAAEA |
| SP 2           | ADF37268.1 | Beta-amylase                            | MKQLCKKGLAFVLMFIFVNAFIL SPINGAAA |
| SP 3           | ADF36976.1 | D-alanyl-D-alanine carboxypeptidase     | MRNAVQKQLICVIAVMLMASVF FVSTQASA  |
| SP 4           | ADF39725.1 | hypothetical protein BMD_2884           | MSLSAKKILLVLVVICLVLVVM QFINRSA   |
| SP 5           | ADF37267.1 | Extracellular ribonuclease              | MKLYALCKKTWASLLVFVLLVS LTPVSQA   |
| SP 6           | ADF37446.1 | conserved hypothetical protein BMD_0560 | MGDLPLNQMMILVVLLMLSFAF SSAETAFA  |
| SP 7           | ADF38066.1 | alkaline phosphatase                    | MRKKLAGITLAGAVALASFGVG NSLIQTEA  |

|       |            |                                                                           |                                    |
|-------|------------|---------------------------------------------------------------------------|------------------------------------|
| SP 8  | ADF38542.1 | cytochrome C oxidase subunit II, periplasmic domain protein               | MSVKNWLMGLVVLFTMVISVM<br>TSGSLGVLA |
| SP 9  | ADF38755.1 | putative peptidoglycan binding domain protein                             | MLKKKTLVTLSTLTLATTCVAFS<br>SPTSEAA |
| SP 10 | ADF39852.1 | conserved hypothetical protein BMD_3012                                   | MKSYRLVSFSTLCICLLVLFISPFQ<br>DTSSA |
| SP 11 | ADF39992.1 | hypothetical protein BMD_3152                                             | MKMKVRTLFLVLFFAGILVVTSY<br>VDNNSQQ |
| SP 12 | ADF40714.1 | putative cell wall endopeptidase                                          | MIWGGNEMKKMLSALLVGGAL<br>FASPAMGHA |
| SP 13 | ADF41182.1 | peptidase, M23/M37 family                                                 | MIDVLRRILVVLVMGLCIGLLFL<br>GGQMVKA |
| SP 14 | ADF38396.1 | levanase                                                                  | MKKKGAYKWITLAVLLVIIAGLII<br>TAVSK  |
| SP 15 | ADF38880.1 | hypothetical protein BMD_2027                                             | MEKRHKSKKKRMIISISLVFLVG<br>GGATG   |
| SP 16 | ADF39133.1 | Bacillolysin precursor (neutral protease)                                 | MKKKKQALKVLLSVGILSSSAF<br>AHTSSA   |
| SP 17 | ADF39282.1 | VanW family protein                                                       | MKKVLGALLLGATIVSAFIAYSM<br>YTNHSA  |
| SP 18 | ADF39902.1 | N-acetylmuramoyl-L-alanine amidase cw1B (Cell wall hydrolase) (Autolysin) | MNKKHVMYTA VSSVLLSSSLLL<br>HSIDADA |

Table S6: List of signal peptides available at pMSP4

| Signal peptide | GenBank ID | Native protein                                | Sequence                           |
|----------------|------------|-----------------------------------------------|------------------------------------|
| SP 1           | ADF40267.1 | hypothetical protein BMD 3427                 | MKWKYKHALISLAIGLLSFVCFVI<br>YSKVAA |
| SP 2           | ADF40379.1 | conserved hypothetical protein BMD_3539       | MKRFRVSAVVLGLALLFSLAP<br>QTVAEA    |
| SP 3           | ADF40719.1 | polysaccharide deacetylase                    | MKTMGYKRILTLLGCCILFLGTA<br>GYIVKA  |
| SP 4           | ADF41608.1 | signal peptide peptidase SppA, 36K type       | MNKKRWIALLIAACLFIFSAIVNI<br>GFSVK  |
| SP 5           | ADF41874.1 | peptidase M23 family protein                  | MTRKTLVMTATILVGLSAAWIG<br>NEKIAYA  |
| SP 6           | ADF38395.1 | levansucrase                                  | MKMKRVAKHTTAATLAAALLV<br>GGGYQTFA  |
| SP 7           | ADF37374.1 | phospholipase/carboxylesterase family protein | MYQRLKKSVELLAILSLAIGIVLS<br>YEKA   |
| SP 8           | ADF37703.1 | conserved hypothetical protein BMD_0841       | MAANKWTKWMVGLSSVAAFTT<br>FIGISQK   |
| SP 9           | ADF37131.1 | ErfK/YbiS/YcfS/YnhG family protein            | MRKIILQAAALFLAAIISISYTASA<br>ANA   |
| SP 10          | ADF37220.1 | conserved hypothetical protein BMD_0309       | MKKKLFGYIMASGLTLGVMAA<br>ANSTAF    |
| SP 11          | ADF37360.1 | conserved hypothetical protein BMD_0470       | MNIKRWLLTATTVILATFGVSAV<br>SSVHA   |

|       |            |                               |                                  |
|-------|------------|-------------------------------|----------------------------------|
| SP 12 | ADF37807.1 | hypothetical protein BMD_0946 | MATKRTFFSFFLISALLCLLVVPN<br>SVMA |
| SP 13 | ADF38126.1 | spore cortex-lytic enzyme     | MKHSYMKSMVVACLATLSFIGF<br>NATATA |
| SP 14 | ADF38532.1 | bacterial SH3 domain protein  | MKKRIKMLISIGIAASLIHSSQSKV<br>HA  |
| SP 15 | ADF39018.1 | protease                      | MKKVSIRSVLSTVAFSVALSSFA<br>MGASA |
| SP 16 | ADF39390.1 | AhpC/TSA family protein       | MVKKIIAVLLLVGFLSYALWQGL<br>SPNGA |
| SP 17 | ADF40060.1 | spore cortex-lytic enzyme     | MSKKRVKKWAVASAASVAFLA<br>SQGTASA |
| SP 18 | ADF38774.1 | hypothetical protein BMD_1921 | MKKVLVGMALFTLVAGVASV<br>GTSVATG  |

Table S7: List of signal peptides available at pMSP5

| Signal peptide | GenBank ID | Native protein                          | Sequence                         |
|----------------|------------|-----------------------------------------|----------------------------------|
| SP 1           | ADF39387.1 | hypothetical protein BMD_2542           | MTKRMITLLSVIFIAVLAVFFM<br>SQTSLA |
| SP 2           | ADF40202.1 | conserved hypothetical protein BMD_3362 | MKKIFPIVLSFGLTTSVSFSTAS<br>NVDA  |
| SP 3           | ADF40323.1 | conserved hypothetical protein BMD_3483 | MKKVFNIGVLFFLIFGLFLGVG<br>PTGKA  |
| SP 4           | ADF37209.1 | subtilisin like serine protease         | MKKSLSALLGVSLLVFGLTLG<br>AESSYA  |
| SP 5           | ADF38432.1 | levanase                                | MKRTVKKLLMIGVACSISLFS<br>ACPVLA  |
| SP 6           | ADF39385.1 | conserved hypothetical protein BMD_2540 | MKKHVKRKVVRLVSLLVVLII<br>VGSYQ   |
| SP 7           | ADF39492.1 | conserved hypothetical protein BMD_2648 | MEMKKFGIILASLALFFSLSTG<br>VTAQA  |
| SP 8           | ADF40338.1 | zinc carboxypeptidase family protein    | MRKTVKRTAVPALLSIGLLLS<br>PLAVQA  |
| SP 9           | ADF40566.1 | L-asparaginase II                       | MKLKRIVSITFLSSVILFSGPLSL<br>VNA  |
| SP 10          | ADF40777.1 | conserved hypothetical protein BMD_3946 | MNRLFKWSASTLLCLMYCFLI<br>PLPSYA  |
| SP 11          | ADF41191.1 | D-alanyl-D-alanine carboxypeptidase     | MKRSKKSIIYLFIVLLCLSGWP<br>SISSA  |
| SP 12          | ADF41282.1 | stage III sporulation protein AE        | MKRWTFKVNILALLFLFFFFP<br>ENVQA   |
| SP 13          | ADF41455.1 | bypass-of-forespore protein C           | MKKVIHQAAFLMLVSIVLCIM<br>PYRADA  |
| SP 14          | ADF42031.1 | conserved hypothetical protein BMD_5232 | MIKWAKVLSTSALGTAIACSSI<br>TTSHA  |
| SP 15          | ADF38000.1 | conserved hypothetical protein BMD_1139 | MKAMVGVNVAAILCGAVM<br>YAGTQHW    |

|       |            |                                         |                                |
|-------|------------|-----------------------------------------|--------------------------------|
| SP 16 | ADF41919.1 | endopeptidase LytF                      | MKKRQLALSLGAIVGGTFLYQ<br>ASAEA |
| SP 17 | ADF37280.1 | conserved hypothetical protein BMD_0369 | MKKRFRIATVAGAVSLGLLTA<br>GQANA |
| SP 18 | ADF37788.1 | conserved hypothetical protein BMD_0927 | MKIFKRMTLAAVTGIFMTGI<br>TETHA  |

Table S8: List of signal peptides available at pMSP6

| Signal peptide | GenBank ID | Native protein                                           | Sequence                       |
|----------------|------------|----------------------------------------------------------|--------------------------------|
| SP 1           | ADF37802.1 | two-component sensor histidine kinase/response regulator | MNNKLKRKSISTQFILLASIL<br>LLAFA |
| SP 2           | ADF37928.1 | modifier protein of major autolysin LytC                 | MRKLTALALVLSVLLFQFTP<br>LASVKA |
| SP 3           | ADF38462.1 | cyanophycinase domain protein                            | MKKKLVSLISFTLLSSLSTP<br>LLAKA  |
| SP 4           | ADF38750.1 | hypothetical protein BMD_1897                            | MLKIRFALSSLLLVFSLVMG<br>APFASA |
| SP 5           | ADF39236.1 | conserved hypothetical protein BMD_2389                  | MKKFLAMIFVLIFSLSFTFY<br>STASA  |
| SP 6           | ADF39288.1 | cell wall-associated protease                            | MKKKGIIISLLSVLLVSSLSV<br>STTQA |
| SP 7           | ADF39306.1 | secreted cell wall DL-endopeptidase                      | MKKKMLLNNTTVLLGLGGI<br>LSTPAYA |
| SP 8           | ADF39980.1 | Lipase/Acylhydrolase (GDSE)                              | MSSTKKVVFISIIILNVFLG<br>VFAFY  |
| SP 9           | ADF39988.1 | transcription regulator domain protein                   | MKKYKIGILAACILLGTA<br>FGIAYQ   |
| SP 10          | ADF40077.1 | cell wall-associated protease                            | MNKKGIISLVSAGLLASTLS<br>VQSVQA |
| SP 11          | ADF40397.1 | conserved hypothetical protein BMD_3564                  | MKKFFKIGCLGFIIILIVVI<br>AVVA   |
| SP 12          | ADF40722.1 | hypothetical protein BMD_3889                            | MMKKKLAVISTACLLILASD<br>PIPSYA |
| SP 13          | ADF40824.1 | conserved hypothetical protein BMD_3993                  | MNRVKIIAASLLAVLLAFS<br>DNFTSA  |
| SP 14          | ADF40826.1 | glycerophosphoryl diester phosphodiesterase              | MRRKWWFVSSLTLCLCGIF<br>MFIHTQA |
| SP 15          | ADF41380.1 | conserved hypothetical protein BMD_4556                  | MIKFTLKSIVLTIFLLCIVFL<br>GMQTA |
| SP 16          | ADF41930.1 | integral membrane protein (DUF1779)                      | MFKKISVFLAIFITGLFVYHG<br>SYVSN |
| SP 17          | ADF40613.1 | conserved hypothetical protein BMD_3780                  | MRKKWSVLLCTLALAMMT<br>FILPVNA  |
| SP 18          | ADF37876.1 | conserved hypothetical protein BMD_1015                  | MYIKKICIGSILFLLFCSSALP<br>AKA  |

Table S9: List of signal peptides available at pMSP7

| Signal peptide | GenBank ID | Native protein                                                         | Sequence                   |
|----------------|------------|------------------------------------------------------------------------|----------------------------|
| SP 1           | ADF38398.1 | transporter, major facilitator family                                  | MRKRIMTALLLVTVLAAMEGTIVST  |
| SP 2           | ADF38764.1 | hypothetical protein BMD_1911                                          | MKRKMIALTFSAALCFSASGSLAEA  |
| SP 3           | ADF38861.1 | foldase protein PrsA                                                   | MSKNKIIMIIAAVVIIAAVAIGAVA  |
| SP 4           | ADF39025.1 | integral membrane protein (DUF6)                                       | MNTSLSKILILCAAVLWGTGTGTAQA |
| SP 5           | ADF39788.1 | conserved hypothetical protein BMD_2948                                | MMKLSKKLMIPVLGASLLMPTIANA  |
| SP 6           | ADF40634.1 | cell wall hydrolase                                                    | MKVMKPIMVTVLGLSLAAFYEGAFP  |
| SP 7           | ADF41279.1 | stage III sporulation protein AH                                       | MLLKKQTVWLLTMLSLVVVLSVYYM  |
| SP 8           | ADF37364.1 | putative exported cell wall-binding protein                            | MKKFVFTLGTTAILSAGFVGAASA   |
| SP 9           | ADF40809.1 | Endopeptidase                                                          | MKKVIAALTLAGVIVSTSPIVSQA   |
| SP 10          | ADF41873.1 | C-terminal processing peptidase                                        | MNRKIVALLMALSLVVGAAAGTYFG  |
| SP 11          | ADF37363.1 | poly(3-hydroxybutyrate) depolymerase                                   | MKRLFIAGIIFILFLSLGAVSSSA   |
| SP 12          | ADF37632.1 | phosphotransferase system (PTS) lichenan-specific enzyme IIB component | MNILLCCAAGMSTSLLVTKMEKSA   |
| SP 13          | ADF37780.1 | conserved hypothetical protein BMD_0919                                | MLGILLIVVAVILVVLITMNAKA    |
| SP 14          | ADF38785.1 | polysaccharide deacetylase                                             | MIRRISILLFTLCFLFNGALPALC   |
| SP 15          | ADF38838.1 | hypothetical protein BMD_1985                                          | MRKFYLAFLLMISTTMVILPSVKA   |
| SP 16          | ADF38954.1 | spore cortex-lytic enzyme                                              | MFKKLAIIIGALAVPMFGMSHGANA  |
| SP 17          | ADF39086.1 | peptidoglycan-binding protein                                          | MKKHIFTLGATALVSI GIADAASA  |
| SP 18          | ADF39204.1 | spore cortex-lytic enzyme                                              | MIKKLVIAIVMLIPSFGAGYSAFA   |

Table S10: List of signal peptides available at pMSP8

| Signal peptide | GenBank ID | Native protein                              | Sequence                 |
|----------------|------------|---------------------------------------------|--------------------------|
| SP 1           | ADF39501.1 | glycerophosphodiester phosphodiesterase     | MKKYLAGLSAVALCCSIASSAFA  |
| SP 2           | ADF39554.1 | conserved hypothetical protein BMD_2710     | MKKTMITFSLVLSLFGVASGASA  |
| SP 3           | ADF39834.1 | LysM domain protein                         | MKKFIFTLGTTAILSAGFVGAASA |
| SP 4           | ADF40014.1 | LPXTG-motif cell wall anchor domain protein | MKKLGAILLSFLLFVGVFPTSSFA |
| SP 5           | ADF40015.1 | sortase family protein                      | MEPRKTRRTINRKKRLIVLSLLAA |
| SP 6           | ADF40996.1 | flagellar biosynthetic protein FliZ         | MLRKVFIAALLISVLGASNQIVYA |
| SP 7           | ADF41210.1 | D-alanine-D-alanine carboxypeptidase        | MKRTIVKLLVVIFLPLMTQPVLA  |
| SP 8           | ADF41368.1 | putative membrane protein                   | MKTLFSFVCFLILATGLFPTISTA |
| SP 9           | ADF39879.1 | cell wall endopeptidase                     | MKKLIYSLALCGSLTVVPTISEA  |
| SP 10          | ADF37299.1 | delta-lactam-biosynthetic de-N-acetylase    | MRRFTFFLVFLFVMSTGIASVEA  |



|       |            |                                          |                         |
|-------|------------|------------------------------------------|-------------------------|
| SP 11 | ADF37407.1 | conserved hypothetical protein BMD_0521  | MKKIGLVLSIAIFFTLSTGVTA  |
| SP 12 | ADF37687.1 | conserved hypothetical protein BMD_0825  | MKKILAFILVIGGTAVLFSTAF  |
| SP 13 | ADF38481.1 | endopeptidase LytF (cell wall hydrolase) | MKKISSLALCSSLIVLPTISQA  |
| SP 14 | ADF38842.1 | Aminopeptidase                           | MKKTVISLAVATSLTSLFTSVQA |
| SP 15 | ADF39052.1 | conserved hypothetical protein BMD_2204  | MTKLMILVFMLISFFVHPQKMKA |
| SP 16 | ADF39606.1 | hypothetical protein BMD_2765            | MVGFILLFPLNMLAGPISSIAEA |
| SP 17 | ADF39900.1 | conserved hypothetical protein BMD_3060  | MKRLFVMVAVIAFLALSRMLVFA |
| SP 18 | ADF39990.1 | conserved hypothetical protein BMD_3150  | MIRKWVAVCVVFAGFIFPQAVSA |

Table S11: List of signal peptides available at pMSP9

| Signal peptide | GenBank ID | Native protein                          | Sequence                |
|----------------|------------|-----------------------------------------|-------------------------|
| SP 1           | ADF40218.1 | domain of unknown function (DUF477)     | MKFLASFALLSLLCNMVSVAF   |
| SP 2           | ADF40725.1 | gamma-glutamyltransferase               | MKVMKMLVIALFSLVVTPTAAA  |
| SP 3           | ADF40822.1 | conserved hypothetical protein BMD_3991 | MKKTLKIVGVGLAVLVTVTVAFF |
| SP 4           | ADF41772.1 | L-Ala--D-Glu endopeptidase              | MRKTIILLFMFMSIFTGWHHVT  |
| SP 5           | ADF42035.1 | conserved hypothetical protein BMD_5236 | MKKRVSLGLSLTLASSAASAF   |
| SP 6           | ADF39900.1 | conserved hypothetical protein BMD_3060 | MKRLFVMVAVIAFLALSRMLVFA |
| SP 7           | ADF37524.1 | alpha amylase                           | MKWKRTSMLLILLLFGSSASA   |
| SP 8           | ADF37686.1 | conserved hypothetical protein BMD_0824 | MKLALLLVIIIIVAAALAGTISA |
| SP 9           | ADF38166.1 | conserved hypothetical protein BMD_1305 | MKKICLLVFLIVLYSGKSVHA   |
| SP 10          | ADF38222.1 | putative sporulation protein YpjB       | MKGRIVGILLVLFAYTTTVHA   |
| SP 11          | ADF38236.1 | conserved hypothetical protein BMD_1375 | MIKILISAVLFFSFMNCSVSAA  |
| SP 12          | ADF38239.1 | aspartate aminotransferase              | MKLAKRVSALTPSSTLAITAKA  |
| SP 13          | ADF39160.1 | conserved hypothetical protein BMD_2312 | MRKIMISAAAFLFMSATPVLA   |
| SP 14          | ADF39756.1 | polysaccharide deacetylase              | MRKISIFVILVLTIVFPSPAFS  |
| SP 15          | ADF40784.1 | hypothetical protein BMD_3953           | MKRYMLSAFLGSLLLLSIAFS   |
| SP 16          | ADF40037.1 | hypothetical protein BMD_3197           | MKKATSILLIVLALAGLGGVCA  |
| SP 17          | ADF37869.1 | capsule biosynthesis protein            | MNKKLLLFNIIAFLLLICVIA   |
| SP 18          | ADF40825.1 | conserved hypothetical protein BMD_3994 | MKWIGGVFTFSFILFMSSWFA   |

Table S12: List of signal peptides available at pMSP10

| Signal peptide | GenBank ID | Native protein                                           | Sequence                  |
|----------------|------------|----------------------------------------------------------|---------------------------|
| SP 1           | ADF40830.1 | conserved hypothetical protein BMD_3999                  | MVKKIALCLLFLMLFPMQIN<br>A |
| SP 2           | ADF37228.1 | conserved hypothetical protein BMD_0317                  | MKVITTVLASAVLVGGLGAS<br>A |
| SP 3           | ADF38580.1 | conserved hypothetical protein BMD_1725                  | MKKAVGIILLILLCCINQRVEA    |
| SP 4           | ADF39850.1 | Copper resistance protein                                | MKKIIGLLLACFLAVPTVSFA     |
| SP 5           | ADF40036.1 | hypothetical protein BMD_3196                            | MRKWSFLFFVLAFMHPASAL<br>A |
| SP 6           | ADF40101.1 | competence-specific nuclease                             | MKKIVSGILILVLAVIVMIEG     |
| SP 7           | ADF37283.1 | Low molecular weight phosphotyrosine protein phosphatase | MINVLFVCLGNICRSPMAEA      |
| SP 8           | ADF40489.1 | malate dehydrogenase, NAD-dependent                      | MAFRRKKIAVIGAGFTGATA      |
| SP 9           | ADF40755.1 | hypothetical protein BMD_3923                            | MKRMRAFAIMTFLVVGSGYA      |
| SP 10          | ADF40786.1 | conserved hypothetical protein BMD_3955                  | MKRLFYTVSTFCFVWLAF        |
| SP 11          | ADF37472.1 | conserved hypothetical protein BMD_0586                  | MSRMKKLAAGAAIGSTVAA       |
| SP 12          | ADF37968.1 | hypothetical protein BMD_1107                            | MLKKIAVLLMMLGIAHF         |
| SP 13          | ADF38163.1 | Ser/Thr protein phosphatase family protein               | MKKTYTRRSFLKG             |
| SP 14          | ADF39761.1 | two-component sensor histidine kinase PhoR               | MKISLKAKMGLV              |
| SP 15          | ADF41187.1 | cytochrome c biogenesis protein                          | MKKKRLIIRTVI              |
| SP 16          | ADF41329.1 | penicillin-binding protein                               | MKKKKRRKSHV               |
| SP 17          | ADF41793.1 | conserved hypothetical protein BMD_4993                  | MSKLKDPSSA                |
| SP 18          | ADF37949.1 | diguanylate cyclase/phosphodiesterase                    | MSIKKKLSVF                |
| SP 19          | ADF39130.1 | conserved hypothetical protein BMD_2282                  | MRKRKQKALI                |
| SP 20          | ADF39284.1 | conserved hypothetical protein BMD_2438                  | MTVRKRKRKK                |

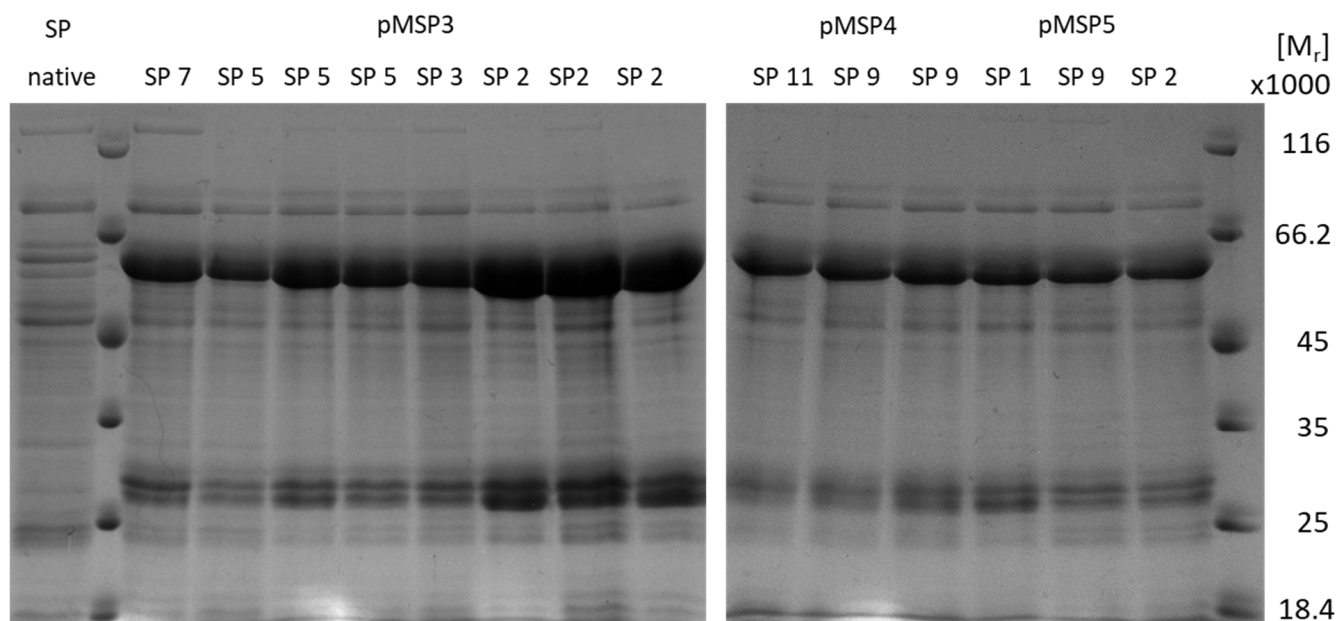

Figure S1: Comparison of extracellular proteins of BmasPGA-secreting selected clones of recombinant *P. megaterium* in upscaling. The clones with the native SP as control or with the alternative SPs were cultured at 37 °C in shake flasks (50 mL culture volume). Twenty-two hours after induction the extracellular proteins were precipitated by ammonium sulfate. pMSP3 to 5 are indicating the corresponding multi SP plasmids, SP X indicates the corresponding SP of the given plasmid as presented in Table 2.

## References

1. Stammen, S.; Müller, B.K.; Korneli, C.; Biedendieck, R.; Gamer, M.; Franco-Lara, E.; Jahn, D. High-yield intra- and extracellular protein production using *Bacillus megaterium*. *Appl. Environ. Microbiol.* **2010**, *76*, 4037–4046.
2. Jordan, E.; Hust, M.; Roth, A.; Biedendieck, R.; Schirrmann, T.; Jahn, D.; Dübel, S. Production of recombinant antibody fragments in *Bacillus megaterium*. *Microb. Cell Fact.* **2007**, *6*, 1–11.
3. Lakowitz, A.; Krull, R.; Biedendieck, R. Recombinant production of the antibody fragment D1.3 scFv with different *Bacillus* strains. *Microb. Cell Fact.* **2017**, *16*, 1–18.
4. Mayer, J.; Pippel, J.; Günther, G.; Müller, C.; Lauermann, A.; Knuuti, T.; Blankenfeldt, W.; Jahn, D.; Biedendieck, R. Crystal structures and protein engineering of three different penicillin G acylases from Gram-positive bacteria with different thermostability. *Appl. Microbiol. Biotechnol.* **2019**, *103*, 7537–7552.
